# Supplementary material for: Effectiveness of Virtual Reality-Based Interventions for Managing Chronic Pain on Pain Reduction, Anxiety, Depression and Mood: A Systematic Review
Source: MDPI journal article supplement (doi:10.3390/healthcare10102047), 2022-10-17
Supplement: s1 [file s1]

**Supplementary Table S1.** Exclusion of full-text article (n = 17)

|    | <b>Study</b>                      | <b>Reason</b>                                                                                                          | <b>Category</b>          |
|----|-----------------------------------|------------------------------------------------------------------------------------------------------------------------|--------------------------|
| 1  | Bermo et al. (2020) [41]          | Pain caused by burn wound dressing and debridement, which was not considered as chronic pain.                          | Non-pertinent outcome    |
| 2  | Chan et al. (2019) [42]           | Pain caused by needle procedural pain was not considered as chronic pain.                                              | Non-pertinent outcome    |
| 3  | Dumoulin et al. (2019) [43]       | Pain caused by needle-related procedures was not considered as chronic pain.                                           | Non-pertinent outcome    |
| 4  | Eijlers et al. (2019) [44]        | Pain caused by surgery was not considered as chronic pain.                                                             | Non-pertinent outcome    |
| 5  | Furness et al. (2019) [45]        | Pain caused by wound dressings in burn care was not considered as chronic pain.                                        | Non-pertinent outcome    |
| 6  | Glennon et al. (2018) [46]        | Pain caused by bone marrow aspiration and biopsy procedure was not considered as chronic pain.                         | Non-pertinent outcome    |
| 7  | Gerçeker et al. (2021) [47]       | Pain caused by Huber needle was not considered as chronic pain.                                                        | Non-pertinent outcome    |
| 8  | Karaman et al. (2019) [48]        | Pain caused by experimental ischemic pain created with a blood pressure instrument was not considered as chronic pain. | Non-pertinent outcome    |
| 9  | McSherry et al. (2018) [49]       | Pain caused by wound care procedures was not considered as chronic pain.                                               | Non-pertinent outcome    |
| 10 | Piskorz & Czub (2018) [50]        | Pain caused by venipuncture was not considered as chronic pain.                                                        | Non-pertinent outcome    |
| 11 | Semerci et al. (2021) [52]        | Pain caused by venous port access was not considered as chronic pain.                                                  | Non-pertinent outcome    |
| 12 | Soltani et al. (2018) [53]        | The outcomes were about balance and joint flexibility after-burn.                                                      | Non-pertinent outcome    |
| 13 | Walther-Larsen et al. (2019) [54] | Pain caused by venous cannulation was not considered as chronic pain.                                                  | Non-pertinent outcome    |
| 14 | Díaz-García et al. (2015) [55]    | The article is the same as the one included in the review (Garcia-Palacios et al., 2015)                               | Duplicated data          |
| 15 | Sarig Bahat et al. (2018) [51]    | The article is the same as the one included in the review Sarig Bahat et al., 2018)                                    | Duplicated data          |
| 16 | Wang & Li (2020) [56]             | Only Chinese version                                                                                                   | Not available in English |
| 17 | Song et al. (2018) [57]           | Only Chinese version                                                                                                   | Not available in English |

**Supplementary Table S2.** Risk of bias assessment

|                                               | Garcia-Palacios, 2015 | Mohammad, 2018 | Jordan, 2016 | Bahat, 2018 | Yelvar, 2017 | Darnall, 2020 | Gromala, 2015 | Amin, 2017 |
|-----------------------------------------------|-----------------------|----------------|--------------|-------------|--------------|---------------|---------------|------------|
| <b>Random sequence generation</b>             | Low                   | Low            | Unclear      | Low         | Unclear      | Low           | Unclear       | Low        |
| <b>Allocation concealment</b>                 | Unclear               | Low            | Unclear      | Low         | Low          | Low           | Unclear       | Unclear    |
| <b>Blinding of participants and personnel</b> | Low                   | Unclear        | Unclear      | Unclear     | Low          | Low           | Unclear       | Unclear    |
| <b>Blinding of outcome assessment</b>         | Unclear               | Unclear        | Low          | Low         | Low          | Unclear       | Unclear       | Unclear    |
| <b>Incomplete outcome data</b>                | Low                   | Low            | Low          | Low         | Low          | Low           | Low           | Low        |
| <b>Selective reporting</b>                    | Low                   | Unclear        | Low          | Low         | High         | Unclear       | High          | Unclear    |
| <b>Other bias</b>                             | Unclear               | Unclear        | Unclear      | Low         | Unclear      | Unclear       | High          | Unclear    |

  

|                      | Mortensen, 2015 | House, 2016 | Villiger, 2013 | Ortiz-Catalan, 2016 | Osumi, 2018 | Shiri, 2013 | Alemanno, 2019 | Wiederhold, 2014 | Garrett, 2017 |
|----------------------|-----------------|-------------|----------------|---------------------|-------------|-------------|----------------|------------------|---------------|
| <b>Selection</b>     |                 |             |                |                     |             |             |                |                  |               |
| 1                    | 1               | 1           | 1              | 1                   | 1           | 1           | 1              | 1                | 1             |
| 2                    | 1               | 1           | 1              | 1                   | 1           | 1           | 1              | 1                | 1             |
| 3                    | 1               | 1           | 1              | 1                   | 1           | 1           | 1              | 1                | 1             |
| 4                    | 0               | 0           | 1              | 0                   | 0           | 0           | 0              | 0                | 0             |
| <b>Comparability</b> |                 |             |                |                     |             |             |                |                  |               |
| 1                    | 1               | 1           | 1              | 1                   | 1           | 1           | 1              | 1                | 1             |
| 2                    | 0               | 0           | 0              | 0                   | 1           | 0           | 1              | 1                | 1             |
| <b>Ascertainment</b> |                 |             |                |                     |             |             |                |                  |               |
| 1                    | 1               | 1           | 1              | 1                   | 1           | 1           | 1              | 1                | 1             |
| 2                    | 1               | 1           | 1              | 1                   | 0           | 1           | 0              | 1                | 0             |
| 3                    | 0               | 1           | 1              | 1                   | 0           | 1           | 0              | 0                | 0             |
| <b>Total</b>         | 6               | 7           | 8              | 7                   | 6           | 7           | 6              | 7                | 6             |
